# Supplementary material
Source: PubMed Central journal article supplement (PMC4806772)

SUPPLEMENTARY DATA

**Supplementary Table 1. Associations of biomarkers of hyperglycemia with incident cardiovascular disease in black and white participants in ARIC**

|                        | Model 1            |                    | Model 2            |                    | Model 3            |                    | Model 4            |                    |
|------------------------|--------------------|--------------------|--------------------|--------------------|--------------------|--------------------|--------------------|--------------------|
|                        | White<br>(N=8,521) | Black<br>(N=2,579) | White<br>(N=8,521) | Black<br>(N=2,579) | White<br>(N=8,521) | Black<br>(N=2,579) | White<br>(N=8,521) | Black<br>(N=2,579) |
|                        | HR<br>(95% CI)     |
| <b>Fasting glucose</b> |                    |                    |                    |                    |                    |                    |                    |                    |
| No diabetes            |                    |                    |                    |                    |                    |                    |                    |                    |
| <100 mg/dL             | 1 (Ref)            | 1 (Ref)            | 1 (Ref)            | 1 (Ref)            |                    |                    | 1 (Ref)            | 1 (Ref)            |
|                        | 1.20               | 0.90               | 1.10               | 0.83               |                    |                    | 1.05               | 0.80               |
| 100-125 mg/dL          | (1.08, 1.33)       | (0.75, 1.08)       | (0.99, 1.22)       | (0.69, 1.00)       |                    |                    | (0.94, 1.17)       | (0.67, 0.96)       |
| ≥126 mg/dL             | 1.58               | 1.35               | 1.29               | 1.16               |                    | --                 | 0.94               | 0.91               |
|                        | (1.30, 1.93)       | (1.04, 1.75)       | (1.06, 1.58)       | (0.89, 1.51)       |                    |                    | (0.76, 1.18)       | (0.68, 1.22)       |
| Diagnosed diabetes     |                    |                    |                    |                    |                    |                    |                    |                    |
| <149 mg/dL             | 2.12               | 1.74               | 1.74               | 1.54               |                    |                    | 1.46               | 1.33               |
|                        | (1.66, 2.72)       | (1.23, 2.47)       | (1.35, 2.24)       | (1.08, 2.19)       |                    |                    | (1.13, 1.89)       | (0.92, 1.90)       |
| ≥149 mg/dL             | 3.28               | 2.66               | 2.60               | 2.36               |                    |                    | 1.20               | 1.26               |
|                        | (2.68, 4.02)       | (2.10, 3.36)       | (2.11, 3.20)       | (1.84, 3.02)       |                    |                    | (0.89, 1.62)       | (0.87, 1.81)       |
| <b>HbA1c</b>           |                    |                    |                    |                    |                    |                    |                    |                    |
| No diabetes            |                    |                    |                    |                    |                    |                    |                    |                    |
| <5.7 %                 | 1 (Ref)            |                    |                    |
|                        | 1.62               | 1.37               | 1.37               | 1.19               | 1.36               | 1.18               |                    |                    |
| 5.7-6.4%               | (1.45, 1.80)       | (1.15, 1.64)       | (1.23, 1.53)       | (0.99, 1.42)       | (1.22, 1.53)       | (0.98, 1.41)       |                    |                    |
| ≥6.5%                  | 1.99               | 1.96               | 1.57               | 1.78               | 1.52               | 1.64               |                    |                    |
|                        | (1.56, 2.55)       | (1.51, 2.54)       | (1.23, 2.02)       | (1.37, 2.33)       | (1.15, 2.00)       | (1.24, 2.17)       | --                 |                    |
| Diagnosed diabetes     |                    |                    |                    |                    |                    |                    |                    |                    |
| <7%                    | 1.83               | 1.89               | 1.49               | 1.58               | 1.47               | 1.50               |                    |                    |
|                        | (1.43, 2.33)       | (1.29, 2.76)       | (1.17, 1.91)       | (1.08, 2.32)       | (1.14, 1.89)       | (1.01, 2.21)       |                    |                    |
| ≥7%                    | 3.98               | 3.61               | 3.30               | 3.29               | 3.05               | 2.60               |                    |                    |
|                        | (3.29, 4.81)       | (2.88, 4.53)       | (2.71, 4.01)       | (2.59, 4.18)       | (2.22, 4.19)       | (1.84, 3.67)       |                    |                    |
| <b>Fructosamine</b>    |                    |                    |                    |                    |                    |                    |                    |                    |
| No diabetes            |                    |                    |                    |                    |                    |                    |                    |                    |
| <239.8 mg/dL           | 1 (Ref)            |
|                        | 0.90               | 0.77               | 0.97               | 0.79               | 0.95               | 0.77               | 0.92               | 0.76               |
| 239.8-268.6 mg/dL      | (0.79, 1.02)       | (0.64, 0.93)       | (0.85, 1.10)       | (0.66, 0.96)       | (0.84, 1.08)       | (0.64, 0.93)       | (0.81, 1.05)       | (0.63, 0.91)       |

SUPPLEMENTARY DATA

|                         |                      |                      |                      |                      |                      |                      |                      |                      |
|-------------------------|----------------------|----------------------|----------------------|----------------------|----------------------|----------------------|----------------------|----------------------|
|                         | 1.52<br>(1.18, 1.97) | 1.31<br>(1.01, 1.72) | 1.36<br>(1.05, 1.77) | 1.14<br>(0.87, 1.50) | 1.23<br>(0.93, 1.63) | 0.97<br>(0.73, 1.30) | 0.97<br>(0.73, 1.29) | 0.89<br>(0.66, 1.20) |
| Diagnosed diabetes      |                      |                      |                      |                      |                      |                      |                      |                      |
| <275.7 mg/dL            | 1.63<br>(1.29, 2.06) | 1.72<br>(1.21, 2.45) | 1.39<br>(1.10, 1.77) | 1.51<br>(1.06, 2.15) | 1.32<br>(1.04, 1.69) | 1.39<br>(0.97, 2.00) | 1.22<br>(0.96, 1.55) | 1.34<br>(0.94, 1.92) |
| ≥275.7 mg/dL            | 3.17<br>(2.62, 3.82) | 2.50<br>(2.03, 3.07) | 2.82<br>(2.32, 3.43) | 2.42<br>(1.94, 3.01) | 2.20<br>(1.61, 3.01) | 1.56<br>(1.11, 2.19) | 1.40<br>(1.04, 1.89) | 1.28<br>(0.91, 1.81) |
| <b>Glycated albumin</b> |                      |                      |                      |                      |                      |                      |                      |                      |
| No diabetes             |                      |                      |                      |                      |                      |                      |                      |                      |
| <13.52%                 | 1 (Ref)              |
| 13.52-15.55%            | 0.86<br>(0.75, 0.98) | 0.92<br>(0.77, 1.09) | 0.98<br>(0.85, 1.12) | 1.00<br>(0.83, 1.19) | 0.97<br>(0.84, 1.11) | 0.98<br>(0.82, 1.17) | 0.93<br>(0.81, 1.07) | 0.95<br>(0.80, 1.14) |
| ≥15.56%                 | 1.64<br>(1.27, 2.12) | 1.35<br>(1.03, 1.76) | 1.52<br>(1.18, 1.96) | 1.29<br>(0.98, 1.69) | 1.43<br>(1.08, 1.88) | 1.12<br>(0.84, 1.49) | 1.09<br>(0.81, 1.45) | 1.02<br>(0.76, 1.37) |
| Diagnosed diabetes      |                      |                      |                      |                      |                      |                      |                      |                      |
| <16.46%                 | 1.57<br>(1.24, 1.99) | 1.69<br>(1.18, 2.43) | 1.33<br>(1.05, 1.69) | 1.54<br>(1.07, 2.21) | 1.29<br>(1.01, 1.65) | 1.45<br>(1.01, 2.09) | 1.18<br>(0.92, 1.50) | 1.40<br>(0.97, 2.02) |
| ≥16.46%                 | 3.29<br>(2.73, 3.97) | 2.69<br>(2.18, 3.31) | 3.01<br>(2.48, 3.65) | 2.69<br>(2.16, 3.36) | 2.60<br>(1.91, 3.55) | 1.85<br>(1.31, 2.60) | 1.60<br>(1.18, 2.17) | 1.50<br>(1.06, 2.13) |
| <b>1,5-AG</b>           |                      |                      |                      |                      |                      |                      |                      |                      |
| No diabetes             |                      |                      |                      |                      |                      |                      |                      |                      |
| ≥15.0 µg/mL             | 1 (Ref)              |
| 7.9-14.9 µg/mL          | 1.10<br>(0.97, 1.24) | 0.77<br>(0.63, 0.93) | 1.15<br>(1.02, 1.29) | 0.88<br>(0.72, 1.07) | 1.13<br>(1.01, 1.28) | 0.87<br>(0.72, 1.06) | 1.11<br>(0.98, 1.25) | 0.88<br>(0.72, 1.07) |
| <7.9 µg/mL              | 1.11<br>(0.85, 1.43) | 0.87<br>(0.58, 1.29) | 1.10<br>(0.85, 1.42) | 0.92<br>(0.62, 1.37) | 1.00<br>(0.77, 1.31) | 0.77<br>(0.50, 1.17) | 0.84<br>(0.63, 1.10) | 0.67<br>(0.43, 1.04) |
| Diagnosed diabetes      |                      |                      |                      |                      |                      |                      |                      |                      |
| >9.2 µg/mL              | 1.73<br>(1.35, 2.21) | 1.52<br>(1.11, 2.09) | 1.47<br>(1.15, 1.88) | 1.39<br>(1.01, 1.92) | 1.37<br>(1.06, 1.76) | 1.26<br>(0.91, 1.75) | 1.30<br>(1.02, 1.67) | 1.22<br>(0.88, 1.69) |
| ≤9.2 µg/mL              | 3.01<br>(2.50, 3.62) | 2.68<br>(2.17, 3.30) | 2.66<br>(2.20, 3.22) | 2.76<br>(2.21, 3.43) | 1.93<br>(1.45, 2.56) | 1.84<br>(1.28, 2.62) | 1.31<br>(0.99, 1.74) | 1.44<br>(0.99, 2.09) |

Model 1: Adjustment for age, gender (male, female), BMI, BMI-squared

Model 2: Model 1 + LDL-c, HDL-c, triglycerides, cholesterol-lowering medication use (yes, no), systolic blood pressure, antihypertensive medication use (yes, no), eGFR, family history of diabetes (yes, no), education level (less than high school, high school or some college, college or more), alcohol consumption (current, former, never), cigarette smoking status (current, former, never), physical activity level

Model 3: Model 2 + fasting glucose

Model 4: Model 2 + HbA1c

SUPPLEMENTARY DATA

**Supplementary Table 2. Associations of biomarkers of hyperglycemia with incident coronary heart disease in black and white participants in ARIC**

|                        | Model 1              |                      | Model 2              |                      | Model 3              |                      | Model 4              |                      |
|------------------------|----------------------|----------------------|----------------------|----------------------|----------------------|----------------------|----------------------|----------------------|
|                        | White<br>(N=8,521)   | Black<br>(N=2,579)   | White<br>(N=8,521)   | Black<br>(N=2,579)   | White<br>(N=8,521)   | Black<br>(N=2,579)   | White<br>(N=8,521)   | Black<br>(N=2,579)   |
|                        | HR<br>(95% CI)       |
| <b>Fasting glucose</b> |                      |                      |                      |                      |                      |                      |                      |                      |
| No diabetes            |                      |                      |                      |                      |                      |                      |                      |                      |
| <100 mg/dL             | 1 (Ref)              | 1 (Ref)              | 1 (Ref)              | 1 (Ref)              |                      |                      | 1 (Ref)              | 1 (Ref)              |
| 100-125 mg/dL          | 1.41<br>(1.19, 1.66) | 1.12<br>(0.82, 1.53) | 1.25<br>(1.06, 1.48) | 1.02<br>(0.75, 1.39) |                      |                      | 1.20<br>(1.02, 1.42) | 0.99<br>(0.73, 1.36) |
| ≥126 mg/dL             | 1.61<br>(1.17, 2.21) | 1.99<br>(1.32, 3.02) | 1.27<br>(0.92, 1.75) | 1.79<br>(1.18, 2.74) | --                   |                      | 0.93<br>(0.65, 1.31) | 1.50<br>(0.96, 2.37) |
| Diagnosed diabetes     |                      |                      |                      |                      |                      |                      |                      |                      |
| <149 mg/dL             | 2.79<br>(1.96, 3.96) | 2.34<br>(1.35, 4.08) | 2.21<br>(1.55, 3.16) | 2.06<br>(1.18, 3.60) |                      |                      | 1.83<br>(1.27, 2.64) | 1.83<br>(1.04, 3.24) |
| ≥149 mg/dL             | 4.43<br>(3.34, 5.88) | 3.66<br>(2.51, 5.32) | 3.26<br>(2.43, 4.37) | 3.24<br>(2.18, 4.81) |                      |                      | 1.53<br>(1.00, 2.34) | 1.99<br>(1.12, 3.56) |
| <b>HbA1c</b>           |                      |                      |                      |                      |                      |                      |                      |                      |
| No diabetes            |                      |                      |                      |                      |                      |                      |                      |                      |
| <5.7 %                 | 1 (Ref)              |                      |                      |
| 5.7-6.4%               | 1.89<br>(1.61, 2.22) | 1.68<br>(1.24, 2.26) | 1.53<br>(1.29, 1.80) | 1.43<br>(1.05, 1.93) | 1.49<br>(1.26, 1.76) | 1.41<br>(1.04, 1.92) |                      |                      |
| ≥6.5%                  | 1.92<br>(1.29, 2.85) | 2.95<br>(1.96, 4.45) | 1.37<br>(0.92, 2.04) | 2.56<br>(1.69, 3.86) | 1.17<br>(0.75, 1.82) | 2.33<br>(1.51, 3.60) | --                   |                      |
| Diagnosed diabetes     |                      |                      |                      |                      |                      |                      |                      |                      |
| <7%                    | 2.38<br>(1.69, 3.36) | 2.95<br>(1.69, 5.17) | 1.95<br>(1.38, 2.75) | 2.39<br>(1.35, 4.21) | 1.81<br>(1.27, 2.59) | 2.24<br>(1.26, 3.98) |                      |                      |
| ≥7%                    | 4.84<br>(3.73, 6.29) | 4.67<br>(3.25, 6.72) | 3.60<br>(2.74, 4.73) | 4.18<br>(2.84, 6.14) | 2.64<br>(1.69, 4.12) | 3.16<br>(1.83, 5.46) |                      |                      |
| <b>Fructosamine</b>    |                      |                      |                      |                      |                      |                      |                      |                      |
| No diabetes            |                      |                      |                      |                      |                      |                      |                      |                      |
| <239.8 mg/dL           | 1 (Ref)              |
| 239.8-268.6 mg/dL      | 0.84<br>(0.69, 1.03) | 0.90<br>(0.67, 1.20) | 0.85<br>(0.70, 1.04) | 0.90<br>(0.67, 1.22) | 0.83<br>(0.68, 1.01) | 0.88<br>(0.65, 1.19) | 0.81<br>(0.66, 0.99) | 0.87<br>(0.64, 1.17) |

SUPPLEMENTARY DATA

|                         |                      |                      |                      |                      |                      |                      |                      |                      |
|-------------------------|----------------------|----------------------|----------------------|----------------------|----------------------|----------------------|----------------------|----------------------|
| ≥268.7 mg/dL            | 1.51<br>(1.02, 2.24) | 1.40<br>(0.91, 2.15) | 1.16<br>(0.77, 1.73) | 1.14<br>(0.74, 1.76) | 0.96<br>(0.63, 1.48) | 0.97<br>(0.61, 1.53) | 0.81<br>(0.52, 1.25) | 0.92<br>(0.58, 1.46) |
| Diagnosed diabetes      |                      |                      |                      |                      |                      |                      |                      |                      |
| <275.7 mg/dL            | 1.92<br>(1.37, 2.69) | 2.06<br>(1.18, 3.57) | 1.65<br>(1.18, 2.32) | 1.73<br>(0.99, 3.03) | 1.50<br>(1.06, 2.13) | 1.58<br>(0.90, 2.77) | 1.43<br>(1.01, 2.02) | 1.53<br>(0.87, 2.70) |
| ≥275.7 mg/dL            | 3.72<br>(2.88, 4.81) | 2.97<br>(2.16, 4.06) | 2.93<br>(2.24, 3.84) | 2.81<br>(2.01, 3.95) | 1.90<br>(1.23, 2.93) | 1.71<br>(1.01, 2.90) | 1.41<br>(0.93, 2.14) | 1.51<br>(0.88, 2.58) |
| <b>Glycated albumin</b> |                      |                      |                      |                      |                      |                      |                      |                      |
| No diabetes             |                      |                      |                      |                      |                      |                      |                      |                      |
| <13.52%                 | 1 (Ref)              |
| 13.52-15.55%            | 0.83<br>(0.68, 1.03) | 1.01<br>(0.76, 1.35) | 0.94<br>(0.76, 1.15) | 1.11<br>(0.83, 1.48) | 0.92<br>(0.74, 1.13) | 1.09<br>(0.81, 1.46) | 0.89<br>(0.72, 1.10) | 1.06<br>(0.79, 1.42) |
| ≥15.56%                 | 1.58<br>(1.07, 2.35) | 1.66<br>(1.10, 2.49) | 1.32<br>(0.88, 1.96) | 1.60<br>(1.05, 2.43) | 1.16<br>(0.75, 1.78) | 1.38<br>(0.89, 2.14) | 0.93<br>(0.60, 1.45) | 1.31<br>(0.83, 2.05) |
| Diagnosed diabetes      |                      |                      |                      |                      |                      |                      |                      |                      |
| <16.46%                 | 1.83<br>(1.30, 2.57) | 2.30<br>(1.34, 3.95) | 1.54<br>(1.09, 2.17) | 2.01<br>(1.16, 3.46) | 1.44<br>(1.01, 2.05) | 1.87<br>(1.08, 3.24) | 1.35<br>(0.95, 1.92) | 1.82<br>(1.05, 3.16) |
| ≥16.46%                 | 3.91<br>(3.03, 5.03) | 3.12<br>(2.26, 4.32) | 3.27<br>(2.51, 4.26) | 3.12<br>(2.21, 4.41) | 2.45<br>(1.59, 3.76) | 2.04<br>(1.20, 3.46) | 1.73<br>(1.13, 2.64) | 1.81<br>(1.05, 3.12) |
| <b>1,5-AG</b>           |                      |                      |                      |                      |                      |                      |                      |                      |
| No diabetes             |                      |                      |                      |                      |                      |                      |                      |                      |
| ≥15.0 µg/mL             | 1 (Ref)              |
| 7.9-14.9 µg/mL          | 1.07<br>(0.89, 1.29) | 0.73<br>(0.53, 1.01) | 1.12<br>(0.93, 1.35) | 0.79<br>(0.57, 1.10) | 1.11<br>(0.92, 1.33) | 0.79<br>(0.57, 1.10) | 1.08<br>(0.90, 1.30) | 0.80<br>(0.57, 1.11) |
| <7.9 µg/mL              | 0.92<br>(0.60, 1.41) | 0.82<br>(0.42, 1.61) | 0.87<br>(0.57, 1.34) | 0.84<br>(0.43, 1.66) | 0.77<br>(0.49, 1.19) | 0.68<br>(0.33, 1.38) | 0.65<br>(0.41, 1.03) | 0.61<br>(0.29, 1.27) |
| Diagnosed diabetes      |                      |                      |                      |                      |                      |                      |                      |                      |
| >9.2 µg/mL              | 1.96<br>(1.38, 2.80) | 1.63<br>(0.99, 2.68) | 1.67<br>(1.17, 2.39) | 1.47<br>(0.89, 2.45) | 1.51<br>(1.05, 2.18) | 1.32<br>(0.78, 2.21) | 1.47<br>(1.03, 2.11) | 1.30<br>(0.77, 2.17) |
| ≤9.2 µg/mL              | 3.64<br>(2.83, 4.69) | 3.04<br>(2.22, 4.16) | 3.00<br>(2.31, 3.90) | 3.00<br>(2.14, 4.19) | 1.98<br>(1.33, 2.95) | 1.85<br>(1.06, 3.24) | 1.47<br>(0.99, 2.18) | 1.55<br>(0.85, 2.82) |

Model 1: Adjustment for age, gender (male, female), BMI, BMI-squared

Model 2: Model 1 + LDL-c, HDL-c, triglycerides, cholesterol-lowering medication use (yes, no), systolic blood pressure, antihypertensive medication use (yes, no), eGFR, family history of diabetes (yes, no), education level (less than high school, high school or some college, college or more), alcohol consumption (current, former, never), cigarette smoking status (current, former, never), physical activity level

Model 3: Model 2 + fasting glucose

Model 4: Model 2 + HbA1c

SUPPLEMENTARY DATA

Supplementary Table 3. Associations of biomarkers of hyperglycemia with incident stroke in black and white participants in ARIC

|                        | Model 1              |                      | Model 2              |                      | Model 3              |                      | Model 4              |                      |
|------------------------|----------------------|----------------------|----------------------|----------------------|----------------------|----------------------|----------------------|----------------------|
|                        | White<br>(N=8,521)   | Black<br>(N=2,579)   | White<br>(N=8,521)   | Black<br>(N=2,579)   | White<br>(N=8,521)   | Black<br>(N=2,579)   | White<br>(N=8,521)   | Black<br>(N=2,579)   |
|                        | HR<br>(95% CI)       |
| <b>Fasting glucose</b> |                      |                      |                      |                      |                      |                      |                      |                      |
| No diabetes            |                      |                      |                      |                      |                      |                      |                      |                      |
| <100 mg/dL             | 1 (Ref)              | 1 (Ref)              | 1 (Ref)              | 1 (Ref)              |                      |                      | 1 (Ref)              | 1 (Ref)              |
| 100-125 mg/dL          | 1.14<br>(0.92, 1.41) | 0.87<br>(0.62, 1.21) | 1.05<br>(0.85, 1.29) | 0.81<br>(0.58, 1.14) |                      |                      | 0.99<br>(0.80, 1.23) | 0.75<br>(0.54, 1.06) |
| ≥126 mg/dL             | 1.97<br>(1.36, 2.85) | 1.91<br>(1.24, 2.95) | 1.65<br>(1.13, 2.40) | 1.65<br>(1.06, 2.56) | --                   |                      | 1.15<br>(0.76, 1.75) | 0.95<br>(0.58, 1.55) |
| Diagnosed diabetes     |                      |                      |                      |                      |                      |                      |                      |                      |
| <149 mg/dL             | 1.85<br>(1.11, 3.06) | 1.23<br>(0.59, 2.59) | 1.60<br>(0.96, 2.68) | 1.13<br>(0.54, 2.39) |                      |                      | 1.30<br>(0.77, 2.19) | 0.80<br>(0.37, 1.70) |
| ≥149 mg/dL             | 3.28<br>(2.21, 4.85) | 2.69<br>(1.77, 4.09) | 2.74<br>(1.83, 4.11) | 2.34<br>(1.51, 3.65) |                      |                      | 1.09<br>(0.61, 1.97) | 0.57<br>(0.30, 1.08) |
| <b>HbA1c</b>           |                      |                      |                      |                      |                      |                      |                      |                      |
| No diabetes            |                      |                      |                      |                      |                      |                      |                      |                      |
| <5.7 %                 | 1 (Ref)              |                      |                      |
| 5.7-6.4%               | 1.60<br>(1.29, 1.99) | 1.57<br>(1.12, 2.19) | 1.43<br>(1.14, 1.78) | 1.38<br>(0.98, 1.93) | 1.42<br>(1.14, 1.78) | 1.35<br>(0.96, 1.90) |                      |                      |
| ≥6.5%                  | 2.66<br>(1.70, 4.15) | 3.31<br>(2.15, 5.09) | 2.18<br>(1.39, 3.43) | 3.13<br>(2.02, 4.87) | 2.13<br>(1.28, 3.53) | 2.64<br>(1.65, 4.22) | --                   |                      |
| Diagnosed diabetes     |                      |                      |                      |                      |                      |                      |                      |                      |
| <7%                    | 1.78<br>(1.08, 2.91) | 1.65<br>(0.75, 3.62) | 1.57<br>(0.95, 2.58) | 1.43<br>(0.65, 3.16) | 1.55<br>(0.93, 2.58) | 1.25<br>(0.56, 2.79) |                      |                      |
| ≥7%                    | 3.75<br>(2.59, 5.44) | 3.94<br>(2.60, 5.97) | 3.30<br>(2.25, 4.86) | 3.56<br>(2.29, 5.54) | 3.13<br>(1.70, 5.78) | 2.13<br>(1.14, 4.00) |                      |                      |
| <b>Fructosamine</b>    |                      |                      |                      |                      |                      |                      |                      |                      |
| No diabetes            |                      |                      |                      |                      |                      |                      |                      |                      |
| <239.8 mg/dL           | 1 (Ref)              |
| 239.8-268.6 mg/dL      | 0.99<br>(0.78, 1.27) | 0.89<br>(0.64, 1.25) | 1.06<br>(0.83, 1.36) | 0.94<br>(0.67, 1.32) | 1.05<br>(0.82, 1.34) | 0.90<br>(0.64, 1.27) | 1.01<br>(0.79, 1.29) | 0.85<br>(0.60, 1.19) |

SUPPLEMENTARY DATA

|                         |                                 |                                 |                                 |                                 |                                 |                                 |                                 |                                 |
|-------------------------|---------------------------------|---------------------------------|---------------------------------|---------------------------------|---------------------------------|---------------------------------|---------------------------------|---------------------------------|
| ≥268.7 mg/dL            | 2.00<br>(1.27, 3.15)            | 2.06<br>(1.35, 3.13)            | 1.83<br>(1.16, 2.91)            | 1.86<br>(1.21, 2.87)            | 1.67<br>(1.02, 2.75)            | 1.49<br>(0.94, 2.38)            | 1.20<br>(0.72, 2.02)            | 1.07<br>(0.65, 1.75)            |
| Diagnosed diabetes      |                                 |                                 |                                 |                                 |                                 |                                 |                                 |                                 |
| <275.7 mg/dL            | 1.61<br>(1.00, 2.60)            | 0.91<br>(0.37, 2.25)            | 1.45<br>(0.89, 2.34)            | 0.88<br>(0.36, 2.17)            | 1.37<br>(0.84, 2.25)            | 0.78<br>(0.31, 1.92)            | 1.22<br>(0.74, 1.99)            | 0.68<br>(0.27, 1.68)            |
| ≥275.7 mg/dL            | 3.02<br>(2.09, 4.37)            | 2.75<br>(1.91, 3.96)            | 2.83<br>(1.93, 4.16)            | 2.61<br>(1.77, 3.85)            | 2.23<br>(1.23, 4.06)            | 1.40<br>(0.77, 2.55)            | 1.15<br>(0.64, 2.07)            | 0.71<br>(0.39, 1.29)            |
| <b>Glycated albumin</b> |                                 |                                 |                                 |                                 |                                 |                                 |                                 |                                 |
| No diabetes             |                                 |                                 |                                 |                                 |                                 |                                 |                                 |                                 |
| <13.52%                 | 1 (Ref)<br>0.99<br>(0.77, 1.27) | 1 (Ref)<br>1.15<br>(0.84, 1.59) | 1 (Ref)<br>1.11<br>(0.86, 1.43) | 1 (Ref)<br>1.32<br>(0.95, 1.82) | 1 (Ref)<br>1.09<br>(0.84, 1.40) | 1 (Ref)<br>1.28<br>(0.92, 1.77) | 1 (Ref)<br>1.03<br>(0.80, 1.33) | 1 (Ref)<br>1.19<br>(0.86, 1.64) |
| 13.52-15.55%            |                                 |                                 |                                 |                                 |                                 |                                 |                                 |                                 |
| ≥15.56%                 | 1.66<br>(1.00, 2.75)            | 2.06<br>(1.33, 3.18)            | 1.54<br>(0.92, 2.55)            | 2.00<br>(1.28, 3.12)            | 1.33<br>(0.77, 2.31)            | 1.58<br>(0.98, 2.56)            | 0.88<br>(0.49, 1.57)            | 1.09<br>(0.65, 1.83)            |
| Diagnosed diabetes      |                                 |                                 |                                 |                                 |                                 |                                 |                                 |                                 |
| <16.46%                 | 1.68<br>(1.05, 2.67)            | 1.16<br>(0.51, 2.66)            | 1.50<br>(0.94, 2.41)            | 1.13<br>(0.49, 2.61)            | 1.40<br>(0.86, 2.26)            | 1.02<br>(0.44, 2.36)            | 1.22<br>(0.76, 1.98)            | 0.91<br>(0.39, 2.09)            |
| ≥16.46%                 | 2.92<br>(2.01, 4.25)            | 2.99<br>(2.05, 4.35)            | 2.75<br>(1.87, 4.04)            | 2.94<br>(1.98, 4.39)            | 1.98<br>(1.07, 3.65)            | 1.53<br>(0.82, 2.85)            | 0.96<br>(0.52, 1.77)            | 0.74<br>(0.40, 1.38)            |
| <b>1,5-AG</b>           |                                 |                                 |                                 |                                 |                                 |                                 |                                 |                                 |
| No diabetes             |                                 |                                 |                                 |                                 |                                 |                                 |                                 |                                 |
| ≥15.0 µg/mL             | 1 (Ref)<br>1.09<br>(0.86, 1.38) | 1 (Ref)<br>0.72<br>(0.50, 1.03) | 1 (Ref)<br>1.15<br>(0.90, 1.45) | 1 (Ref)<br>0.82<br>(0.56, 1.18) | 1 (Ref)<br>1.13<br>(0.89, 1.44) | 1 (Ref)<br>0.81<br>(0.56, 1.17) | 1 (Ref)<br>1.10<br>(0.87, 1.40) | 1 (Ref)<br>0.81<br>(0.56, 1.17) |
| 7.9-14.9 µg/mL          |                                 |                                 |                                 |                                 |                                 |                                 |                                 |                                 |
| <7.9 µg/mL              | 1.72<br>(1.13, 2.63)            | 1.84<br>(1.09, 3.09)            | 1.74<br>(1.14, 2.66)            | 1.99<br>(1.18, 3.37)            | 1.60<br>(1.03, 2.48)            | 1.62<br>(0.92, 2.87)            | 1.25<br>(0.79, 2.00)            | 0.99<br>(0.53, 1.88)            |
| Diagnosed diabetes      |                                 |                                 |                                 |                                 |                                 |                                 |                                 |                                 |
| >9.2 µg/mL              | 1.70<br>(1.04, 2.77)            | 0.72<br>(0.32, 1.63)            | 1.55<br>(0.95, 2.54)            | 0.67<br>(0.29, 1.52)            | 1.44<br>(0.87, 2.38)            | 0.58<br>(0.25, 1.34)            | 1.33<br>(0.81, 2.19)            | 0.50<br>(0.22, 1.15)            |
| ≤9.2 µg/mL              | 2.90<br>(2.01, 4.18)            | 2.90<br>(2.03, 4.16)            | 2.64<br>(1.81, 3.85)            | 2.89<br>(1.98, 4.23)            | 1.93<br>(1.12, 3.33)            | 1.75<br>(0.95, 3.23)            | 1.12<br>(0.65, 1.93)            | 0.78<br>(0.41, 1.48)            |

Model 1: Adjustment for age, gender (male, female), BMI, BMI-squared

Model 2: Model 1 + LDL-c, HDL-c, triglycerides, cholesterol-lowering medication use (yes, no), systolic blood pressure, antihypertensive medication use (yes, no), eGFR, family history of diabetes (yes, no), education level (less than high school, high school or some college, college or more), alcohol consumption (current, former, never), cigarette smoking status (current, former, never), physical activity level

Model 3: Model 2 + fasting glucose

Model 4: Model 2 + HbA1c

SUPPLEMENTARY DATA

**Supplementary Table 4. Associations of biomarkers of hyperglycemia with incident heart failure in black and white participants in ARIC**

|                        | Model 1            |                    | Model 2            |                    | Model 3            |                    | Model 4            |                    |
|------------------------|--------------------|--------------------|--------------------|--------------------|--------------------|--------------------|--------------------|--------------------|
|                        | White<br>(N=8,521) | Black<br>(N=2,579) | White<br>(N=8,521) | Black<br>(N=2,579) | White<br>(N=8,521) | Black<br>(N=2,579) | White<br>(N=8,521) | Black<br>(N=2,579) |
|                        | HR<br>(95% CI)     |
| <b>Fasting glucose</b> |                    |                    |                    |                    |                    |                    |                    |                    |
| No diabetes            |                    |                    |                    |                    |                    |                    |                    |                    |
| <100 mg/dL             | 1 (Ref)            | 1 (Ref)            | 1 (Ref)            | 1 (Ref)            |                    |                    | 1 (Ref)            | 1 (Ref)            |
|                        | 1.13               | 0.88               | 1.04               | 0.83               |                    |                    | 0.99               | 0.79               |
| 100-125 mg/dL          | (0.98, 1.30)       | (0.70, 1.11)       | (0.90, 1.20)       | (0.66, 1.04)       |                    |                    | (0.86, 1.14)       | (0.63, 1.00)       |
| ≥126 mg/dL             | 1.47               | 1.14               | 1.22               | 0.99               |                    |                    | 0.87               | 0.79               |
|                        | (1.14, 1.90)       | (0.82, 1.60)       | (0.94, 1.58)       | (0.70, 1.39)       | --                 |                    | (0.65, 1.15)       | (0.55, 1.15)       |
| Diagnosed diabetes     |                    |                    |                    |                    |                    |                    |                    |                    |
| <149 mg/dL             | 1.94               | 2.35               | 1.53               | 2.13               |                    |                    | 1.28               | 1.86               |
|                        | (1.41, 2.66)       | (1.58, 3.48)       | (1.11, 2.12)       | (1.43, 3.18)       |                    |                    | (0.92, 1.77)       | (1.24, 2.80)       |
| ≥149 mg/dL             | 3.77               | 3.33               | 3.07               | 2.99               |                    |                    | 1.37               | 1.70               |
|                        | (2.97, 4.78)       | (2.53, 4.39)       | (2.40, 3.92)       | (2.23, 4.02)       |                    |                    | (0.95, 1.96)       | (1.09, 2.65)       |
| <b>HbA1c</b>           |                    |                    |                    |                    |                    |                    |                    |                    |
| No diabetes            |                    |                    |                    |                    |                    |                    |                    |                    |
| <5.7 %                 | 1 (Ref)            |                    |                    |
|                        | 1.51               | 1.32               | 1.30               | 1.15               | 1.28               | 1.13               |                    |                    |
| 5.7-6.4%               | (1.31, 1.75)       | (1.05, 1.65)       | (1.12, 1.50)       | (0.91, 1.45)       | (1.10, 1.48)       | (0.90, 1.42)       |                    |                    |
| ≥6.5%                  | 2.07               | 1.62               | 1.69               | 1.45               | 1.51               | 1.28               |                    |                    |
|                        | (1.53, 2.79)       | (1.16, 2.27)       | (1.25, 2.30)       | (1.03, 2.03)       | (1.07, 2.12)       | (0.89, 1.82)       | --                 |                    |
| Diagnosed diabetes     |                    |                    |                    |                    |                    |                    |                    |                    |
| <7%                    | 1.68               | 2.59               | 1.35               | 2.25               | 1.27               | 2.07               |                    |                    |
|                        | (1.23, 2.30)       | (1.71, 3.93)       | (0.98, 1.85)       | (1.47, 3.43)       | (0.92, 1.76)       | (1.34, 3.18)       |                    |                    |
| ≥7%                    | 4.78               | 4.46               | 4.08               | 4.06               | 3.23               | 2.86               |                    |                    |
|                        | (3.83, 5.96)       | (3.42, 5.82)       | (3.24, 5.13)       | (3.05, 5.39)       | (2.22, 4.70)       | (1.90, 4.30)       |                    |                    |
| <b>Fructosamine</b>    |                    |                    |                    |                    |                    |                    |                    |                    |
| No diabetes            |                    |                    |                    |                    |                    |                    |                    |                    |
| <239.8 mg/dL           | 1 (Ref)            |
|                        | 0.93               | 0.78               | 1.04               | 0.80               | 1.00               | 0.78               | 0.98               | 0.77               |
| 239.8-268.6 mg/dL      | (0.79, 1.10)       | (0.62, 1.00)       | (0.87, 1.23)       | (0.63, 1.02)       | (0.84, 1.19)       | (0.61, 0.99)       | (0.83, 1.16)       | (0.60, 0.98)       |

SUPPLEMENTARY DATA

|                         |                      |                      |                      |                      |                      |                      |                      |                      |
|-------------------------|----------------------|----------------------|----------------------|----------------------|----------------------|----------------------|----------------------|----------------------|
| ≥268.7 mg/dL            | 1.27<br>(0.89, 1.82) | 1.44<br>(1.04, 2.00) | 1.20<br>(0.84, 1.73) | 1.21<br>(0.86, 1.69) | 0.97<br>(0.66, 1.44) | 1.00<br>(0.70, 1.43) | 0.81<br>(0.55, 1.21) | 0.99<br>(0.69, 1.41) |
| Diagnosed diabetes      |                      |                      |                      |                      |                      |                      |                      |                      |
| <275.7 mg/dL            | 1.56<br>(1.16, 2.10) | 2.50<br>(1.70, 3.69) | 1.34<br>(1.00, 1.81) | 2.30<br>(1.55, 3.41) | 1.21<br>(0.89, 1.64) | 2.13<br>(1.43, 3.16) | 1.15<br>(0.85, 1.56) | 2.11<br>(1.42, 3.14) |
| ≥275.7 mg/dL            | 3.82<br>(3.07, 4.75) | 3.27<br>(2.58, 4.15) | 3.45<br>(2.75, 4.33) | 3.14<br>(2.42, 4.06) | 2.18<br>(1.50, 3.16) | 1.94<br>(1.31, 2.87) | 1.63<br>(1.14, 2.34) | 1.89<br>(1.26, 2.83) |
| <b>Glycated albumin</b> |                      |                      |                      |                      |                      |                      |                      |                      |
| No diabetes             |                      |                      |                      |                      |                      |                      |                      |                      |
| <13.52%                 | 1 (Ref)              |
| 13.52-15.55%            | 0.87<br>(0.73, 1.04) | 0.90<br>(0.72, 1.13) | 1.00<br>(0.83, 1.19) | 0.95<br>(0.75, 1.19) | 0.97<br>(0.81, 1.16) | 0.92<br>(0.74, 1.16) | 0.94<br>(0.79, 1.13) | 0.91<br>(0.72, 1.14) |
| ≥15.56%                 | 1.59<br>(1.15, 2.20) | 1.40<br>(1.01, 1.94) | 1.51<br>(1.09, 2.10) | 1.26<br>(0.90, 1.76) | 1.29<br>(0.91, 1.84) | 1.06<br>(0.74, 1.51) | 1.05<br>(0.73, 1.52) | 1.04<br>(0.72, 1.49) |
| Diagnosed diabetes      |                      |                      |                      |                      |                      |                      |                      |                      |
| <16.46%                 | 1.55<br>(1.15, 2.08) | 2.46<br>(1.66, 3.64) | 1.30<br>(0.97, 1.75) | 2.27<br>(1.53, 3.37) | 1.20<br>(0.89, 1.63) | 2.12<br>(1.43, 3.16) | 1.14<br>(0.84, 1.54) | 2.11<br>(1.41, 3.14) |
| ≥16.46%                 | 3.91<br>(3.14, 4.85) | 3.46<br>(2.71, 4.41) | 3.64<br>(2.91, 4.56) | 3.40<br>(2.62, 4.42) | 2.60<br>(1.80, 3.76) | 2.17<br>(1.45, 3.25) | 1.89<br>(1.31, 2.73) | 2.11<br>(1.39, 3.21) |
| <b>1,5-AG</b>           |                      |                      |                      |                      |                      |                      |                      |                      |
| No diabetes             |                      |                      |                      |                      |                      |                      |                      |                      |
| ≥15.0 µg/mL             | 1 (Ref)              |
| 7.9-14.9 µg/mL          | 1.14<br>(0.97, 1.33) | 0.78<br>(0.61, 0.99) | 1.18<br>(1.01, 1.38) | 0.88<br>(0.68, 1.12) | 1.16<br>(0.99, 1.36) | 0.87<br>(0.68, 1.12) | 1.13<br>(0.97, 1.33) | 0.87<br>(0.68, 1.12) |
| <7.9 µg/mL              | 0.99<br>(0.69, 1.41) | 0.75<br>(0.44, 1.29) | 1.01<br>(0.71, 1.44) | 0.82<br>(0.47, 1.40) | 0.86<br>(0.60, 1.24) | 0.66<br>(0.38, 1.17) | 0.74<br>(0.51, 1.08) | 0.66<br>(0.37, 1.17) |
| Diagnosed diabetes      |                      |                      |                      |                      |                      |                      |                      |                      |
| >9.2 µg/mL              | 1.63<br>(1.19, 2.23) | 2.07<br>(1.45, 2.95) | 1.35<br>(0.99, 1.85) | 1.92<br>(1.34, 2.75) | 1.21<br>(0.87, 1.66) | 1.74<br>(1.21, 2.51) | 1.18<br>(0.86, 1.62) | 1.76<br>(1.22, 2.53) |
| ≤9.2 µg/mL              | 3.63<br>(2.93, 4.51) | 3.48<br>(2.73, 4.42) | 3.30<br>(2.64, 4.13) | 3.62<br>(2.80, 4.67) | 2.05<br>(1.47, 2.88) | 2.33<br>(1.53, 3.54) | 1.59<br>(1.14, 2.23) | 2.28<br>(1.47, 3.55) |

Model 1: Adjustment for age, gender (male, female), BMI, BMI-squared

Model 2: Model 1 + LDL-c, HDL-c, triglycerides, cholesterol-lowering medication use (yes, no), systolic blood pressure, antihypertensive medication use (yes, no), eGFR, family history of diabetes (yes, no), education level (less than high school, high school or some college, college or more), alcohol consumption (current, former, never), cigarette smoking status (current, former, never), physical activity level

Model 3: Model 2 + fasting glucose

Model 4: Model 2 + HbA1c



SUPPLEMENTARY DATA

**Supplementary Table 5. Associations of biomarkers of hyperglycemia with incident end-stage renal disease in black and white participants in ARIC**

|                        | Model 1                 |                        | Model 2                |                        | Model 3                |                        | Model 4               |                       |
|------------------------|-------------------------|------------------------|------------------------|------------------------|------------------------|------------------------|-----------------------|-----------------------|
|                        | White<br>(N=8,521)      | Black<br>(N=2,579)     | White<br>(N=8,521)     | Black<br>(N=2,579)     | White<br>(N=8,521)     | Black<br>(N=2,579)     | White<br>(N=8,521)    | Black<br>(N=2,579)    |
|                        | HR<br>(95% CI)          | HR<br>(95% CI)         | HR<br>(95% CI)         | HR<br>(95% CI)         | HR<br>(95% CI)         | HR<br>(95% CI)         | HR<br>(95% CI)        | HR<br>(95% CI)        |
| <b>Fasting glucose</b> |                         |                        |                        |                        |                        |                        |                       |                       |
| No diabetes            |                         |                        |                        |                        |                        |                        |                       |                       |
| <100 mg/dL             | 1 (Ref)                 | 1 (Ref)                | 1 (Ref)                | 1 (Ref)                |                        |                        | 1 (Ref)               | 1 (Ref)               |
| 100-125 mg/dL          | 1.80<br>(0.93, 3.45)    | 1.21<br>(0.59, 2.49)   | 1.41<br>(0.72, 2.76)   | 1.22<br>(0.59, 2.53)   |                        |                        | 1.28<br>(0.65, 2.51)  | 1.15<br>(0.55, 2.39)  |
| ≥126 mg/dL             | 4.03<br>(1.60, 10.12)   | 2.79<br>(1.20, 6.49)   | 2.93<br>(1.14, 7.51)   | 3.03<br>(1.28, 7.15)   |                        | --                     | 1.53<br>(0.56, 4.21)  | 2.30<br>(0.94, 5.67)  |
| Diagnosed diabetes     |                         |                        |                        |                        |                        |                        |                       |                       |
| <149 mg/dL             | 8.90<br>(3.61, 21.92)   | 7.00<br>(2.87, 17.08)  | 6.74<br>(2.64, 17.19)  | 7.69<br>(3.05, 19.43)  |                        |                        | 4.22<br>(1.60, 11.16) | 6.46<br>(2.52, 16.52) |
| ≥149 mg/dL             | 15.67<br>(7.23, 33.98)  | 12.52<br>(6.22, 25.23) | 11.37<br>(4.90, 26.40) | 15.91<br>(7.37, 34.37) |                        |                        | 2.01<br>(0.65, 6.27)  | 7.18<br>(2.52, 20.41) |
| <b>HbA1c</b>           |                         |                        |                        |                        |                        |                        |                       |                       |
| No diabetes            |                         |                        |                        |                        |                        |                        |                       |                       |
| <5.7 %                 | 1 (Ref)                 | 1 (Ref)                | 1 (Ref)                | 1 (Ref)                | 1 (Ref)                | 1 (Ref)                |                       |                       |
| 5.7-6.4%               | 3.16<br>(1.80, 5.57)    | 1.35<br>(0.68, 2.65)   | 2.40<br>(1.34, 4.30)   | 1.34<br>(0.67, 2.68)   | 2.32<br>(1.29, 4.16)   | 1.30<br>(0.65, 2.59)   |                       |                       |
| ≥6.5%                  | 5.62<br>(2.09, 15.10)   | 3.47<br>(1.58, 7.63)   | 5.01<br>(1.81, 13.87)  | 3.96<br>(1.78, 8.84)   | 3.86<br>(1.29, 11.53)  | 3.32<br>(1.46, 7.56)   |                       |                       |
| Diagnosed diabetes     |                         |                        |                        |                        |                        |                        |                       |                       |
| <7%                    | 5.05<br>(1.92, 13.30)   | 6.20<br>(2.50, 15.37)  | 4.21<br>(1.58, 11.25)  | 6.79<br>(2.62, 17.60)  | 3.63<br>(1.33, 9.97)   | 6.10<br>(2.34, 15.92)  |                       |                       |
| ≥7%                    | 20.99<br>(11.25, 39.14) | 13.70<br>(7.34, 25.56) | 18.04<br>(9.03, 36.04) | 17.91<br>(8.85, 36.24) | 10.88<br>(3.84, 30.76) | 10.22<br>(4.17, 25.07) |                       |                       |
| <b>Fructosamine</b>    |                         |                        |                        |                        |                        |                        |                       |                       |
| No diabetes            |                         |                        |                        |                        |                        |                        |                       |                       |
| <239.8 mg/dL           | 1 (Ref)                 | 1 (Ref)                | 1 (Ref)                | 1 (Ref)                | 1 (Ref)                | 1 (Ref)                | 1 (Ref)               | 1 (Ref)               |
| 239.8-268.6 mg/dL      | 0.94                    | 0.61                   | 0.91                   | 0.57                   | 0.84                   | 0.53                   | 0.83                  | 0.52                  |

SUPPLEMENTARY DATA

|                         |               |               |               |               |               |               |              |               |
|-------------------------|---------------|---------------|---------------|---------------|---------------|---------------|--------------|---------------|
|                         | (0.50, 1.89)  | (0.28, 1.35)  | (0.45, 1.85)  | (0.25, 1.27)  | (0.41, 1.70)  | (0.24, 1.19)  | (0.41, 1.69) | (0.23, 1.17)  |
| ≥268.7 mg/dL            | 2.17          | 3.41          | 1.04          | 2.54          | 0.79          | 1.95          | 0.57         | 1.84          |
| Diagnosed diabetes      | (0.67, 7.03)  | (1.69, 6.89)  | (0.29, 3.70)  | (1.23, 5.24)  | (0.22, 2.79)  | (0.92, 4.14)  | (0.16, 2.07) | (0.85, 3.97)  |
| <275.7 mg/dL            | 3.99          | 6.26          | 3.86          | 6.55          | 3.05          | 5.92          | 2.80         | 5.77          |
|                         | (1.76, 9.05)  | (2.94, 13.31) | (1.67, 8.92)  | (2.98, 14.40) | (1.30, 7.17)  | (2.69, 13.02) | (1.19, 6.56) | (2.61, 12.77) |
| ≥275.7 mg/dL            | 11.10         | 9.29          | 8.42          | 10.82         | 2.67          | 4.94          | 1.29         | 4.43          |
|                         | (6.27, 19.65) | (5.57, 15.49) | (4.41, 16.08) | (6.00, 19.52) | (0.93, 7.64)  | (2.16, 11.30) | (0.46, 3.58) | (1.82, 10.76) |
| <b>Glycated albumin</b> |               |               |               |               |               |               |              |               |
| No diabetes             |               |               |               |               |               |               |              |               |
| <13.52%                 | 1 (Ref)       | 1 (Ref)      | 1 (Ref)       |
| 13.52-15.55%            | 1.55          | 0.84          | 1.63          | 0.93          | 1.53          | 0.91          | 1.45         | 0.88          |
|                         | (0.82, 2.94)  | (0.43, 1.63)  | (0.85, 3.11)  | (0.47, 1.84)  | (0.80, 2.93)  | (0.46, 1.81)  | (0.76, 2.77) | (0.45, 1.74)  |
| ≥15.56%                 | 3.14          | 2.19          | 3.06          | 1.95          | 2.21          | 1.59          | 1.35         | 1.53          |
|                         | (1.11, 8.88)  | (0.99, 4.86)  | (1.06, 8.80)  | (0.85, 4.43)  | (0.73, 6.69)  | (0.69, 3.69)  | (0.42, 4.33) | (0.65, 3.62)  |
| Diagnosed diabetes      |               |               |               |               |               |               |              |               |
| <16.46%                 | 4.42          | 4.49          | 4.17          | 4.50          | 3.37          | 4.12          | 2.98         | 4.08          |
|                         | (1.94, 10.11) | (1.94, 10.38) | (1.79, 9.68)  | (1.88, 10.76) | (1.42, 8.04)  | (1.71, 9.89)  | (1.25, 7.07) | (1.70, 9.83)  |
| ≥16.46%                 | 12.83         | 9.91          | 11.19         | 12.92         | 5.07          | 6.96          | 2.22         | 6.36          |
|                         | (7.18, 22.92) | (5.91, 16.62) | (5.86, 21.38) | (7.06, 23.63) | (1.85, 13.89) | (3.02, 16.06) | (0.80, 6.14) | (2.49, 16.22) |
| <b>1,5-AG</b>           |               |               |               |               |               |               |              |               |
| No diabetes             |               |               |               |               |               |               |              |               |
| ≥15.0 µg/mL             | 1 (Ref)       | 1 (Ref)      | 1 (Ref)       |
| 7.9-14.9 µg/mL          | 1.03          | 0.63          | 1.06          | 0.67          | 1.02          | 0.67          | 0.98         | 0.66          |
|                         | (0.51, 2.07)  | (0.30, 1.31)  | (0.53, 2.12)  | (0.32, 1.42)  | (0.51, 2.05)  | (0.32, 1.40)  | (0.49, 1.96) | (0.31, 1.39)  |
| <7.9 µg/mL              | 2.16          | 1.26          | 1.49          | 1.48          | 1.20          | 1.18          | 0.89         | 1.16          |
|                         | (0.77, 6.05)  | (0.39, 4.11)  | (0.49, 4.53)  | (0.45, 4.91)  | (0.39, 3.67)  | (0.35, 4.03)  | (0.29, 2.77) | (0.33, 4.01)  |
| Diagnosed diabetes      |               |               |               |               |               |               |              |               |
| >9.2 µg/mL              | 4.17          | 3.63          | 3.65          | 3.97          | 2.87          | 3.57          | 2.77         | 3.54          |
|                         | (1.76, 9.88)  | (1.68, 7.84)  | (1.52, 8.76)  | (1.77, 8.90)  | (1.17, 7.03)  | (1.58, 8.07)  | (1.14, 6.72) | (1.57, 8.01)  |
| ≤9.2 µg/mL              | 10.61         | 9.38          | 8.99          | 11.74         | 3.67          | 6.24          | 1.75         | 5.80          |
|                         | (5.99, 18.79) | (5.77, 15.24) | (4.81, 16.79) | (6.68, 20.64) | (1.43, 9.43)  | (2.74, 14.18) | (0.68, 4.51) | (2.31, 14.56) |

Model 1: Adjustment for age, gender (male, female), BMI, BMI-squared

Model 2: Model 1 + LDL-c, HDL-c, triglycerides, cholesterol-lowering medication use (yes, no), systolic blood pressure, antihypertensive medication use (yes, no), eGFR, family history of diabetes (yes, no), education level (less than high school, high school or some college, college or more), alcohol consumption (current, former, never), cigarette smoking status (current, former, never), physical activity level

Model 3: Model 2 + fasting glucose

Model 4: Model 2 + HbA1c

SUPPLEMENTARY DATA

Supplementary Table 6. Associations of biomarkers of hyperglycemia with prevalent retinopathy in black and white participants in ARIC

|                        | Model 1                 |                         | Model 2                 |                         | Model 3               |                       | Model 4               |                       |
|------------------------|-------------------------|-------------------------|-------------------------|-------------------------|-----------------------|-----------------------|-----------------------|-----------------------|
|                        | White<br>(N=6,878)      | Black<br>(N=1,737)      | White<br>(N=6,878)      | Black<br>(N=1,737)      | White<br>(N=6,878)    | Black<br>(N=1,737)    | White<br>(N=6,878)    | Black<br>(N=1,737)    |
|                        | OR<br>(95% CI)          | OR<br>(95% CI)          | OR<br>(95% CI)          | OR<br>(95% CI)          | OR<br>(95% CI)        | OR<br>(95% CI)        | OR<br>(95% CI)        | OR<br>(95% CI)        |
| <b>Fasting glucose</b> |                         |                         |                         |                         |                       |                       |                       |                       |
| No diabetes            |                         |                         |                         |                         |                       |                       |                       |                       |
| <100 mg/dL             | 1 (Ref)                 | 1 (Ref)                 | 1 (Ref)                 | 1 (Ref)                 |                       |                       | 1 (Ref)               | 1 (Ref)               |
| 100-125 mg/dL          | 1.64<br>(1.04, 2.57)    | 1.06<br>(0.56, 2.01)    | 1.59<br>(1.01, 2.50)    | 0.99<br>(0.52, 1.89)    |                       |                       | 1.42<br>(0.90, 2.25)  | 0.92<br>(0.48, 1.75)  |
| ≥126 mg/dL             | 2.23<br>(1.02, 4.86)    | 1.82<br>(0.75, 4.45)    | 2.01<br>(0.91, 4.45)    | 1.65<br>(0.66, 4.11)    |                       |                       | 0.88<br>(0.36, 2.13)  | 0.94<br>(0.35, 2.55)  |
| Diagnosed diabetes     |                         |                         |                         |                         |                       |                       |                       |                       |
| <149 mg/dL             | 4.63<br>(2.05, 10.46)   | 4.29<br>(1.58, 11.59)   | 4.11<br>(1.79, 9.44)    | 4.12<br>(1.49, 11.38)   |                       |                       | 2.30<br>(0.95, 5.52)  | 2.91<br>(1.02, 8.27)  |
| ≥149 mg/dL             | 36.20<br>(21.47, 61.03) | 21.53<br>(11.25, 41.19) | 33.06<br>(18.95, 57.67) | 20.00<br>(9.97, 40.13)  |                       |                       | 5.74<br>(2.54, 12.96) | 5.58<br>(2.11, 14.72) |
| <b>HbA1c</b>           |                         |                         |                         |                         |                       |                       |                       |                       |
| No diabetes            |                         |                         |                         |                         |                       |                       |                       |                       |
| <5.7 %                 | 1 (Ref)                 | 1 (Ref)                 | 1 (Ref)                 | 1 (Ref)                 | 1 (Ref)               | 1 (Ref)               |                       |                       |
| 5.7-6.4%               | 0.96<br>(0.58, 1.59)    | 1.25<br>(0.69, 2.28)    | 0.92<br>(0.55, 1.54)    | 1.13<br>(0.61, 2.06)    | 0.83<br>(0.50, 1.40)  | 1.08<br>(0.59, 1.98)  |                       |                       |
| ≥6.5%                  | 1.84<br>(0.72, 4.72)    | 1.31<br>(0.47, 3.61)    | 1.60<br>(0.61, 4.16)    | 1.10<br>(0.39, 3.09)    | 0.83<br>(0.30, 2.31)  | 0.73<br>(0.25, 2.17)  |                       |                       |
| Diagnosed diabetes     |                         |                         |                         |                         |                       |                       |                       |                       |
| <7%                    | 1.11<br>(0.35, 3.60)    | 2.05<br>(0.59, 7.14)    | 1.02<br>(0.31, 3.31)    | 1.80<br>(0.51, 6.42)    | 0.74<br>(0.22, 2.45)  | 1.33<br>(0.36, 4.89)  |                       |                       |
| ≥7%                    | 30.73<br>(20.22, 46.69) | 24.33<br>(13.51, 43.80) | 28.98<br>(18.28, 45.94) | 23.12<br>(12.24, 43.66) | 8.26<br>(3.85, 17.73) | 7.98<br>(3.22, 19.82) |                       |                       |
| <b>Fructosamine</b>    |                         |                         |                         |                         |                       |                       |                       |                       |
| No diabetes            |                         |                         |                         |                         |                       |                       |                       |                       |
| <239.8 mg/dL           | 1 (Ref)                 | 1 (Ref)                 | 1 (Ref)                 | 1 (Ref)                 | 1 (Ref)               | 1 (Ref)               | 1 (Ref)               | 1 (Ref)               |

SUPPLEMENTARY DATA

|                         |                         |                         |                         |                         |                        |                        |                       |                        |
|-------------------------|-------------------------|-------------------------|-------------------------|-------------------------|------------------------|------------------------|-----------------------|------------------------|
| 239.8-268.6 mg/dL       | 1.69<br>(1.08, 2.67)    | 1.06<br>(0.57, 1.98)    | 1.69<br>(1.06, 2.68)    | 1.07<br>(0.57, 2.03)    | 1.54<br>(0.97, 2.45)   | 1.00<br>(0.53, 1.89)   | 1.51<br>(0.95, 2.40)  | 1.00<br>(0.53, 1.89)   |
| ≥268.7 mg/dL            | 2.37<br>(0.94, 5.98)    | 1.54<br>(0.58, 4.06)    | 2.16<br>(0.84, 5.53)    | 1.39<br>(0.52, 3.73)    | 1.23<br>(0.45, 3.36)   | 0.91<br>(0.32, 2.59)   | 0.99<br>(0.34, 2.83)  | 0.85<br>(0.29, 2.48)   |
| Diagnosed diabetes      |                         |                         |                         |                         |                        |                        |                       |                        |
| <275.7 mg/dL            | 1.92<br>(0.76, 4.90)    | 1.88<br>(0.55, 6.42)    | 1.82<br>(0.71, 4.67)    | 1.96<br>(0.56, 6.80)    | 1.41<br>(0.54, 3.67)   | 1.58<br>(0.45, 5.61)   | 1.35<br>(0.52, 3.50)  | 1.63<br>(0.47, 5.74)   |
| ≥275.7 mg/dL            | 35.61<br>(23.43, 54.11) | 21.98<br>(13.04, 37.08) | 33.13<br>(21.05, 52.13) | 20.93<br>(11.84, 36.99) | 10.23<br>(4.82, 21.70) | 7.35<br>(3.13, 17.23)  | 8.19<br>(3.81, 17.62) | 7.13<br>(2.99, 17.03)  |
| <b>Glycated albumin</b> |                         |                         |                         |                         |                        |                        |                       |                        |
| No diabetes             |                         |                         |                         |                         |                        |                        |                       |                        |
| <13.52%                 | 1 (Ref)                 | 1 (Ref)                 | 1 (Ref)                 | 1 (Ref)                 | 1 (Ref)                | 1 (Ref)                | 1 (Ref)               | 1 (Ref)                |
| 13.52-15.55%            | 0.69<br>(0.37, 1.27)    | 1.35<br>(0.73, 2.48)    | 0.68<br>(0.36, 1.26)    | 1.35<br>(0.73, 2.52)    | 0.62<br>(0.33, 1.16)   | 1.29<br>(0.69, 2.40)   | 0.60<br>(0.32, 1.11)  | 1.27<br>(0.68, 2.36)   |
| ≥15.56%                 | 2.48<br>(1.06, 5.81)    | 2.63<br>(1.10, 6.28)    | 2.24<br>(0.95, 5.30)    | 2.49<br>(1.03, 6.06)    | 1.29<br>(0.51, 3.27)   | 1.73<br>(0.68, 4.44)   | 0.98<br>(0.36, 2.63)  | 1.64<br>(0.62, 4.30)   |
| Diagnosed diabetes      |                         |                         |                         |                         |                        |                        |                       |                        |
| <16.46%                 | 1.56<br>(0.61, 3.97)    | 2.18<br>(0.63, 7.55)    | 1.45<br>(0.56, 3.74)    | 2.19<br>(0.62, 7.71)    | 1.11<br>(0.43, 2.91)   | 1.85<br>(0.52, 6.61)   | 1.05<br>(0.40, 2.78)  | 1.89<br>(0.53, 6.70)   |
| ≥16.46%                 | 31.92<br>(21.21, 48.06) | 25.92<br>(14.86, 45.23) | 29.34<br>(18.86, 45.63) | 25.24<br>(13.85, 45.99) | 9.23<br>(4.38, 19.46)  | 10.22<br>(4.29, 24.33) | 7.13<br>(3.27, 15.58) | 10.15<br>(4.18, 24.65) |
| <b>1,5-AG</b>           |                         |                         |                         |                         |                        |                        |                       |                        |
| No diabetes             |                         |                         |                         |                         |                        |                        |                       |                        |
| ≥15.0 µg/mL             | 1 (Ref)                 | 1 (Ref)                 | 1 (Ref)                 | 1 (Ref)                 | 1 (Ref)                | 1 (Ref)                | 1 (Ref)               | 1 (Ref)                |
| 7.9-14.9 µg/mL          | 1.13<br>(0.68, 1.86)    | 0.82<br>(0.41, 1.65)    | 1.16<br>(0.70, 1.92)    | 0.81<br>(0.40, 1.65)    | 1.12<br>(0.67, 1.85)   | 0.80<br>(0.39, 1.62)   | 1.08<br>(0.65, 1.79)  | 0.80<br>(0.40, 1.63)   |
| <7.9 µg/mL              | 2.39<br>(1.08, 5.28)    | 3.36<br>(1.43, 7.91)    | 2.46<br>(1.11, 5.46)    | 3.31<br>(1.38, 7.92)    | 1.61<br>(0.69, 3.75)   | 2.48<br>(0.98, 6.24)   | 1.33<br>(0.54, 3.23)  | 2.33<br>(0.90, 6.03)   |
| Diagnosed diabetes      |                         |                         |                         |                         |                        |                        |                       |                        |
| >9.2 µg/mL              | 1.66<br>(0.59, 4.62)    | 2.31<br>(0.79, 6.78)    | 1.49<br>(0.53, 4.21)    | 2.30<br>(0.77, 6.86)    | 1.11<br>(0.39, 3.17)   | 1.93<br>(0.64, 5.82)   | 1.14<br>(0.40, 3.25)  | 2.03<br>(0.68, 6.09)   |
| ≤9.2 µg/mL              | 28.34<br>(18.88, 42.53) | 23.42<br>(13.89, 39.51) | 27.94<br>(17.94, 43.53) | 23.14<br>(13.11, 40.82) | 8.80<br>(4.46, 17.36)  | 10.24<br>(4.50, 23.31) | 7.30<br>(3.59, 14.83) | 10.55<br>(4.48, 24.83) |

## SUPPLEMENTARY DATA

Model 1: Adjustment for age, gender (male, female), BMI, BMI-squared

Model 2: Model 1 + LDL-c, HDL-c, triglycerides, cholesterol-lowering medication use (yes, no), systolic blood pressure, antihypertensive medication use (yes, no), eGFR, family history of diabetes (yes, no), education level (less than high school, high school or some college, college or more), alcohol consumption (current, former, never), cigarette smoking status (current, former, never), physical activity level

Model 3: Model 2 + fasting glucose

Model 4: Model 2 + HbA1c

SUPPLEMENTARY DATA

**Supplementary Table 7. Associations of biomarkers of hyperglycemia with incident CVD, incident ESRD, and prevalent retinopathy in black and white participants in ARIC, censoring or excluding participants who developed diabetes after baseline**

|                        | Incident CVD*        |                      | Incident ESRD*          |                         | Prevalent Retinopathy*  |                         |
|------------------------|----------------------|----------------------|-------------------------|-------------------------|-------------------------|-------------------------|
|                        | White<br>(N=8,521)   | Black<br>(N=2,579)   | White<br>(N=8,521)      | Black<br>(N=2,579)      | White<br>(N=5,285)      | Black<br>(N=1,195)      |
|                        | HR<br>(95% CI)       | HR<br>(95% CI)       | HR<br>(95% CI)          | HR<br>(95% CI)          | OR<br>(95% CI)          | OR<br>(95% CI)          |
| <b>Fasting glucose</b> |                      |                      |                         |                         |                         |                         |
| No diabetes            |                      |                      |                         |                         |                         |                         |
| <100 mg/dL             | 1 (Ref)              | 1 (Ref)              | 1 (Ref)                 | 1 (Ref)                 | 1 (Ref)                 | 1 (Ref)                 |
| 100-125 mg/dL          | 1.00<br>(0.87, 1.15) | 0.87<br>(0.68, 1.10) | 1.22<br>(0.51, 2.92)    | 1.17<br>(0.39, 3.55)    | 1.47<br>(0.88, 2.44)    | 1.06<br>(0.49, 2.30)    |
| ≥126 mg/dL             | 0.95<br>(0.66, 1.36) | 1.37<br>(0.91, 2.07) | 3.34<br>(0.68, 16.30)   | 1.81<br>(0.20, 15.96)   | 3.33<br>(0.95, 11.65)   | 6.83<br>(1.95, 23.91)   |
| Diagnosed diabetes     |                      |                      |                         |                         |                         |                         |
| <149 mg/dL             | 2.41<br>(1.86, 3.13) | 2.24<br>(1.54, 3.26) | 10.43<br>(3.63, 30.02)  | 14.99<br>(4.69, 47.96)  | 4.15<br>(1.77, 9.72)    | 4.53<br>(1.56, 13.20)   |
| ≥149 mg/dL             | 3.53<br>(2.82, 4.42) | 3.25<br>(2.45, 4.30) | 26.14<br>(9.65, 70.84)  | 34.94<br>(12.35, 98.89) | 34.92<br>(19.18, 63.57) | 22.01<br>(10.10, 47.97) |
| <b>HbA1c</b>           |                      |                      |                         |                         |                         |                         |
| No diabetes            |                      |                      |                         |                         |                         |                         |
| <5.7 %                 | 1 (Ref)              | 1 (Ref)              | 1 (Ref)                 | 1 (Ref)                 | 1 (Ref)                 | 1 (Ref)                 |
| 5.7-6.4%               | 1.36<br>(1.17, 1.58) | 1.24<br>(0.98, 1.58) | 3.24<br>(1.47, 7.17)    | 1.67<br>(0.55, 5.05)    | 0.35<br>(0.13, 0.98)    | 1.90<br>(0.91, 3.95)    |
| ≥6.5%                  | 1.55<br>(0.92, 2.62) | 2.84<br>(1.92, 4.22) | N/A†                    | 5.50<br>(1.02, 29.60)   | 4.04<br>(0.48, 34.12)   | N/A†                    |
| Diagnosed diabetes     |                      |                      |                         |                         |                         |                         |
| <7%                    | 2.24<br>(1.74, 2.90) | 2.35<br>(1.57, 3.51) | 8.35<br>(2.87, 24.31)   | 16.23<br>(5.02, 52.49)  | 1.02<br>(0.31, 3.36)    | 2.23<br>(0.59, 8.39)    |
| ≥7%                    | 4.63<br>(3.76, 5.71) | 4.56<br>(3.47, 5.99) | 42.56<br>(18.64, 97.15) | 46.41<br>(17.51, 123.0) | 29.56<br>(17.89, 48.82) | 30.37<br>(14.51, 63.59) |
| <b>Fructosamine</b>    |                      |                      |                         |                         |                         |                         |
| No diabetes            |                      |                      |                         |                         |                         |                         |
| <239.8 mg/dL           | 1 (Ref)              | 1 (Ref)              | 1 (Ref)                 | 1 (Ref)                 | 1 (Ref)                 | 1 (Ref)                 |
| 239.8-268.6 mg/dL      | 0.89                 | 0.85                 | 0.65                    | 0.16                    | 1.48                    | 1.50                    |

SUPPLEMENTARY DATA

|                         |              |              |                |                |                |                |
|-------------------------|--------------|--------------|----------------|----------------|----------------|----------------|
|                         | (0.75, 1.07) | (0.66, 1.10) | (0.22, 1.92)   | (0.02, 1.26)   | (0.82, 2.65)   | (0.70, 3.22)   |
| ≥268.7 mg/dL            | 1.17         | 1.44         | N/A†           | 2.05           | 2.37           | 1.06           |
|                         | (0.74, 1.86) | (0.96, 2.17) |                | (0.44, 9.51)   | (0.54, 10.32)  | (0.13, 8.36)   |
| Diagnosed diabetes      |              |              |                |                |                |                |
| <275.7 mg/dL            | 2.12         | 2.21         | 7.10           | 12.11          | 1.98           | 2.07           |
|                         | (1.66, 2.70) | (1.53, 3.20) | (2.83, 17.83)  | (4.77, 30.79)  | (0.76, 5.14)   | (0.57, 7.55)   |
| ≥275.7 mg/dL            | 4.00         | 3.39         | 18.57          | 22.27          | 34.53          | 22.68          |
|                         | (3.25, 4.92) | (2.65, 4.34) | (8.70, 39.64)  | (10.34, 47.95) | (20.82, 57.25) | (11.77, 43.72) |
| <b>Glycated albumin</b> |              |              |                |                |                |                |
| No diabetes             |              |              |                |                |                |                |
| <13.52%                 | 1 (Ref)      | 1 (Ref)      | 1 (Ref)        | 1 (Ref)        | 1 (Ref)        | 1 (Ref)        |
|                         | 0.98         | 1.09         | 1.35           | 0.56           | 0.74           | 1.92           |
| 13.52-15.55%            | (0.81, 1.18) | (0.86, 1.39) | (0.53, 3.45)   | (0.15, 2.04)   | (0.36, 1.53)   | (0.88, 4.16)   |
| ≥15.56%                 | 1.46         | 1.59         | N/A†           | 0.89           | 1.68           | 5.60           |
|                         | (0.92, 2.31) | (1.06, 2.39) |                | (0.10, 7.68)   | (0.22, 12.84)  | (1.44, 21.74)  |
| Diagnosed diabetes      |              |              |                |                |                |                |
| <16.46%                 | 2.05         | 2.28         | 7.59           | 8.49           | 1.66           | 2.36           |
|                         | (1.60, 2.62) | (1.56, 3.33) | (3.00, 19.23)  | (3.08, 23.42)  | (0.63, 4.33)   | (0.63, 8.81)   |
| ≥16.46%                 | 4.30         | 3.75         | 23.73          | 28.09          | 31.19          | 28.86          |
|                         | (3.50, 5.28) | (2.92, 4.80) | (11.11, 50.66) | (12.77, 61.81) | (19.06, 51.02) | (14.33, 58.13) |
| <b>1,5-AG</b>           |              |              |                |                |                |                |
| No diabetes             |              |              |                |                |                |                |
| ≥15.0 µg/mL             | 1 (Ref)      | 1 (Ref)      | 1 (Ref)        | 1 (Ref)        | 1 (Ref)        | 1 (Ref)        |
|                         | 1.13         | 0.85         | 1.34           | 1.50           | 0.81           | 0.85           |
| 7.9-14.9 µg/mL          | (0.96, 1.34) | (0.65, 1.11) | (0.53, 3.35)   | (0.50, 4.53)   | (0.41, 1.60)   | (0.35, 2.05)   |
| <7.9 µg/mL              | 0.83         | 1.25         | N/A†           | 2.45           | 1.40           | 5.67           |
|                         | (0.53, 1.30) | (0.72, 2.20) |                | (0.30, 19.77)  | (0.33, 5.86)   | (1.75, 18.37)  |
| Diagnosed diabetes      |              |              |                |                |                |                |
| >9.2 µg/mL              | 2.21         | 1.97         | 7.50           | 12.41          | 1.55           | 2.32           |
|                         | (1.71, 2.85) | (1.40, 2.75) | (2.89, 19.48)  | (4.49, 34.29)  | (0.54, 4.43)   | (0.75, 7.19)   |
| ≤9.2 µg/mL              | 3.91         | 3.70         | 23.30          | 39.04          | 28.25          | 23.32          |
|                         | (3.19, 4.80) | (2.90, 4.72) | (10.90, 49.79) | (17.02, 89.53) | (17.26, 46.26) | (12.17, 44.71) |

\*Models include adjustment for age, gender (male, female), BMI, BMI-squared, LDL-c, HDL-c, triglycerides, cholesterol-lowering medication use (yes, no), systolic blood pressure, antihypertensive medication use (yes, no), eGFR, family history of diabetes (yes, no), education level (less than high school, high school or some college, college or more), alcohol consumption (current, former, never), cigarette smoking status (current, former, never), and physical activity level.

† Since many participants were excluded from the analyses for retinopathy (or were no longer considered as having experienced the event of interest for CVD or ESRD), for some of the categories, there were no participants who experienced the event of interest. Therefore, HRs and ORs were unable to be estimated, indicated as “N/A”.

## SUPPLEMENTARY DATA

### Supplementary Figure 1. Age- and sex-adjusted incidence rates for cardiovascular disease and end-stage renal disease and prevalence of retinopathy by race

Adjusted incidence rates for CVD and ESRD are per 1,000 person-years. Error bars represent 95% confidence intervals for incidence rates and prevalence. P-values were calculated using Wald tests to test for differences in incidence rates and prevalence between whites and blacks. Abbreviations: CVD, cardiovascular disease; ESRD, end-stage renal disease.

#### Panel A. CVD

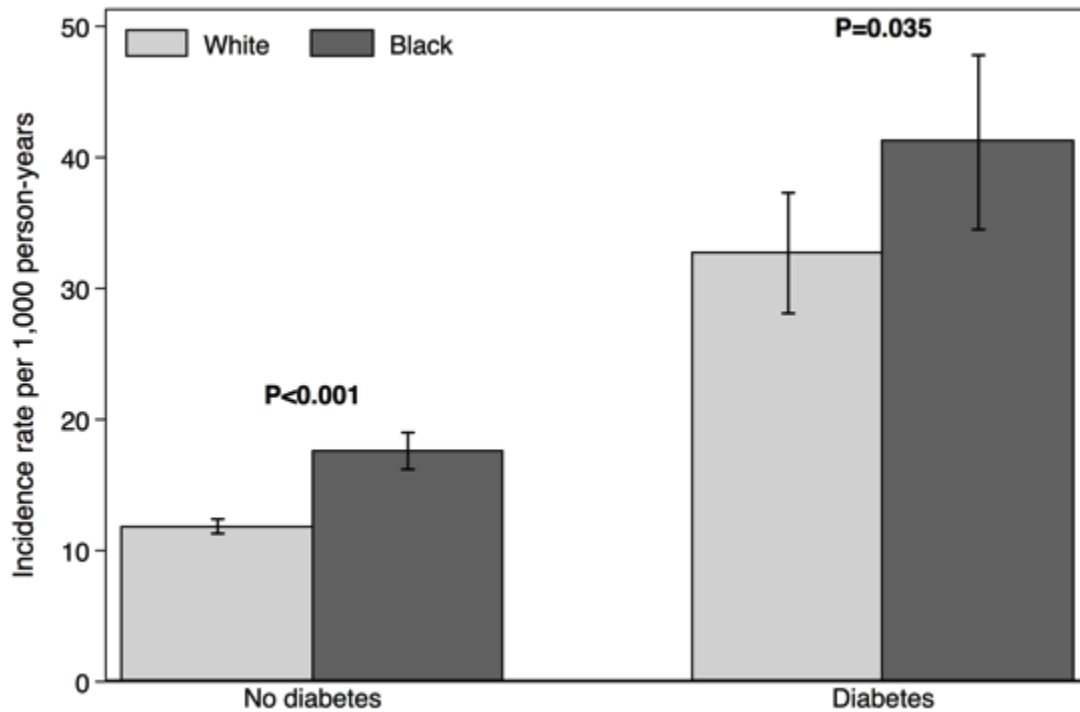



SUPPLEMENTARY DATA

Panel B. ESRD

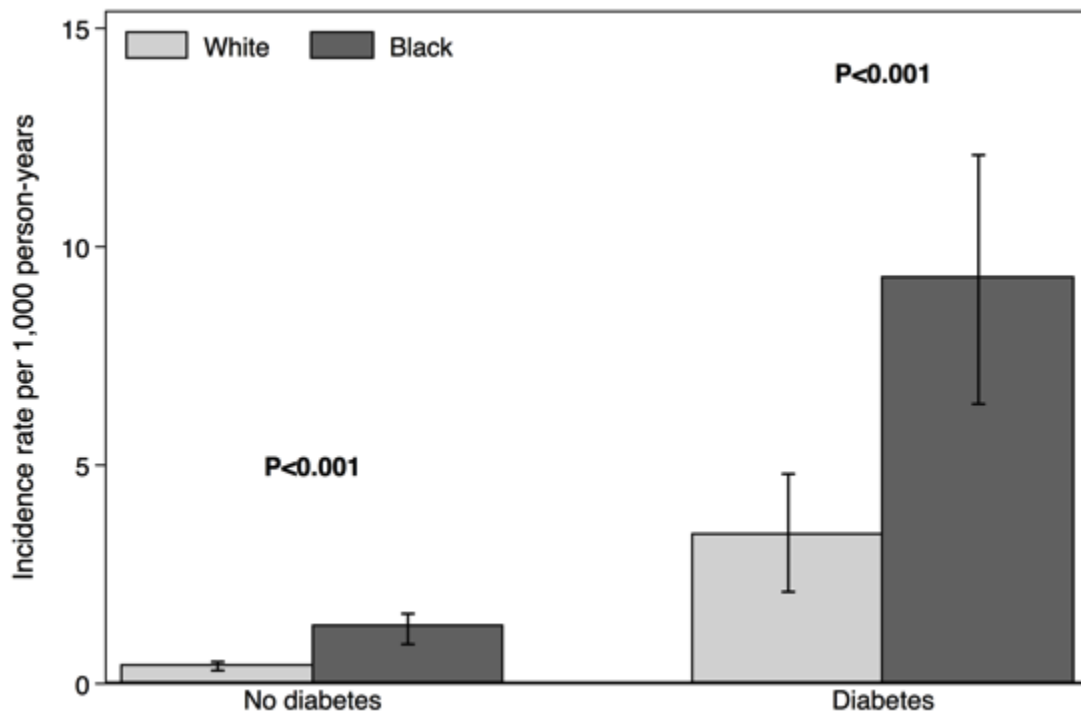

SUPPLEMENTARY DATA

Panel C. Retinopathy

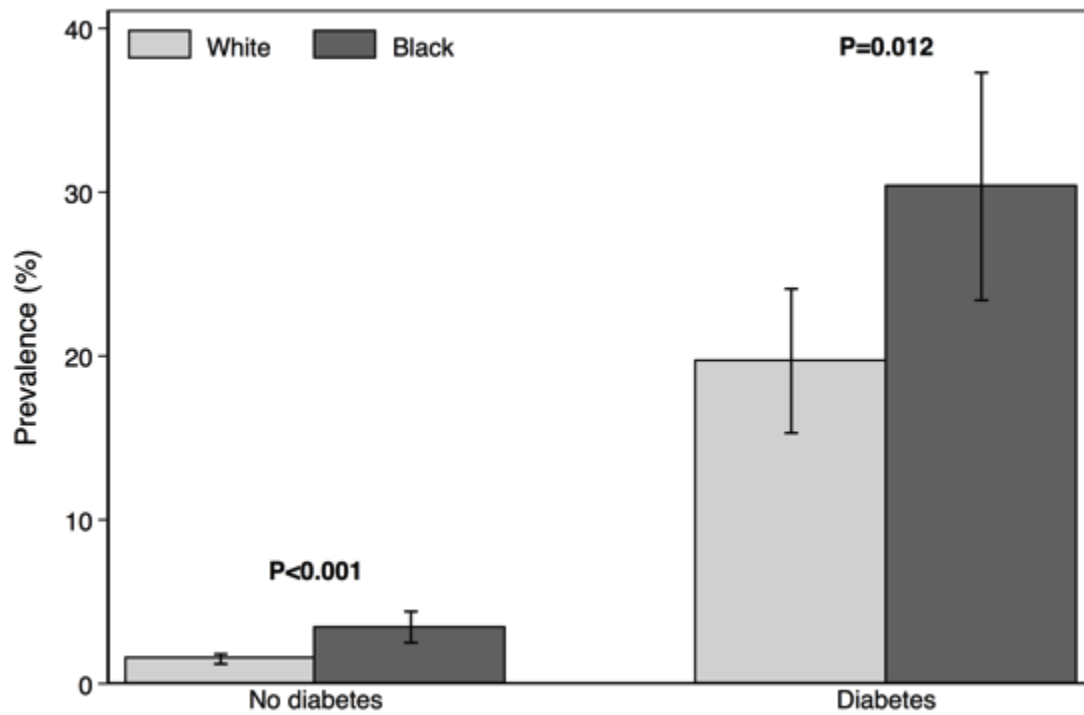

Supplement: supp_dc15-1360v151360_DC151360SupplementaryData.pdf [file supp_dc15-1360v151360_DC151360SupplementaryData.pdf]
